# Supplementary material
Source: publisher site journal article supplement (https://www.dovepress.com/article/559772)

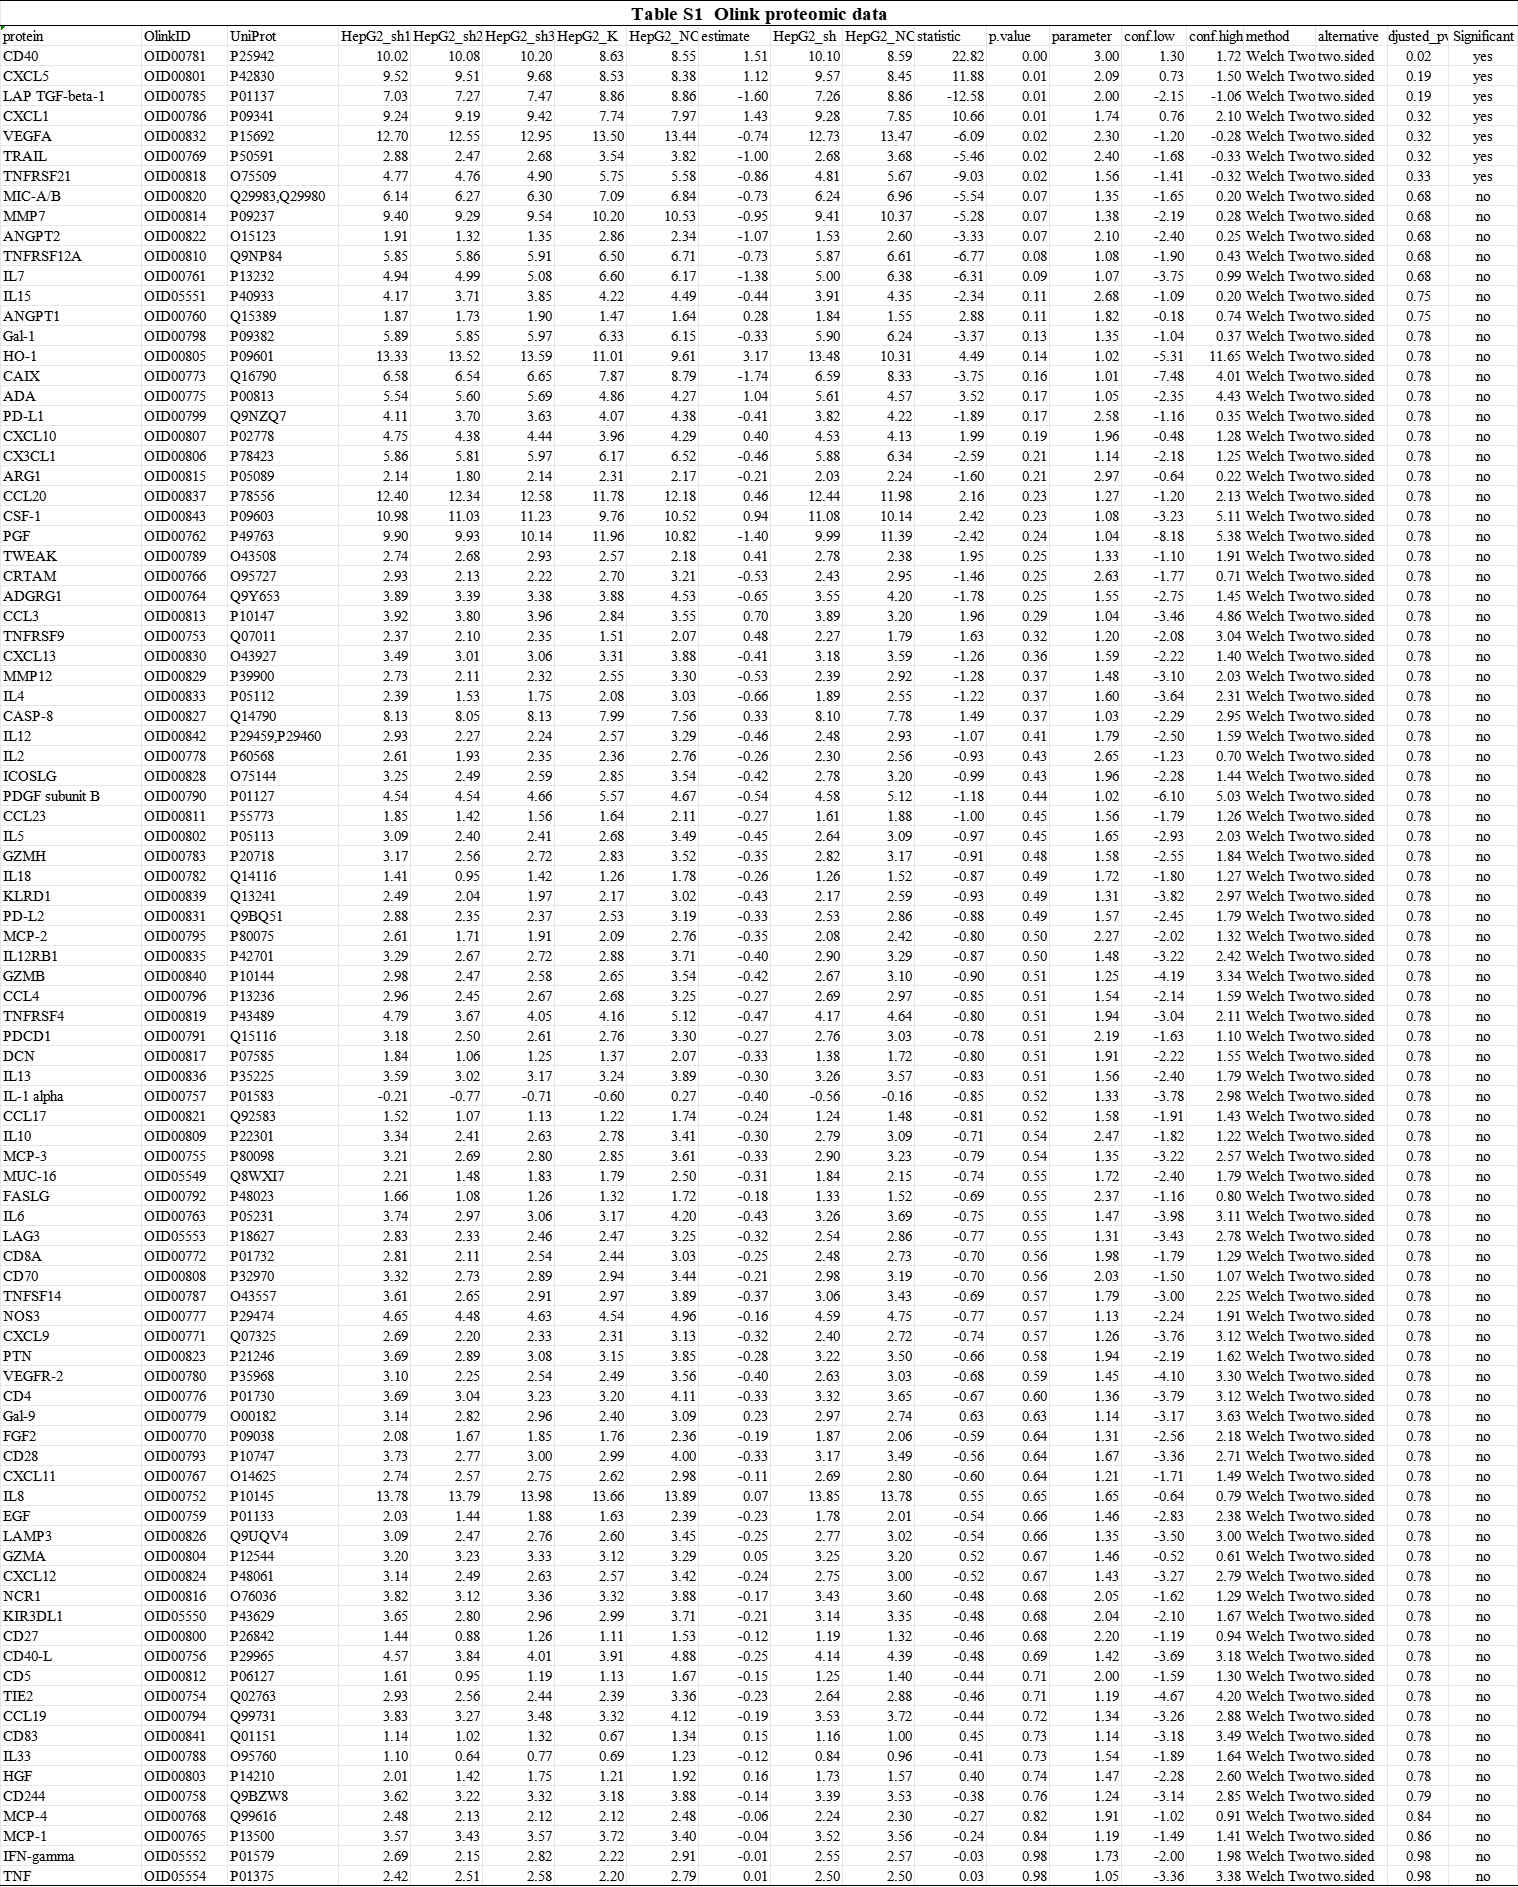


**Figure S1:  IL‑1β is elevated following CDCA3 knockdown.**


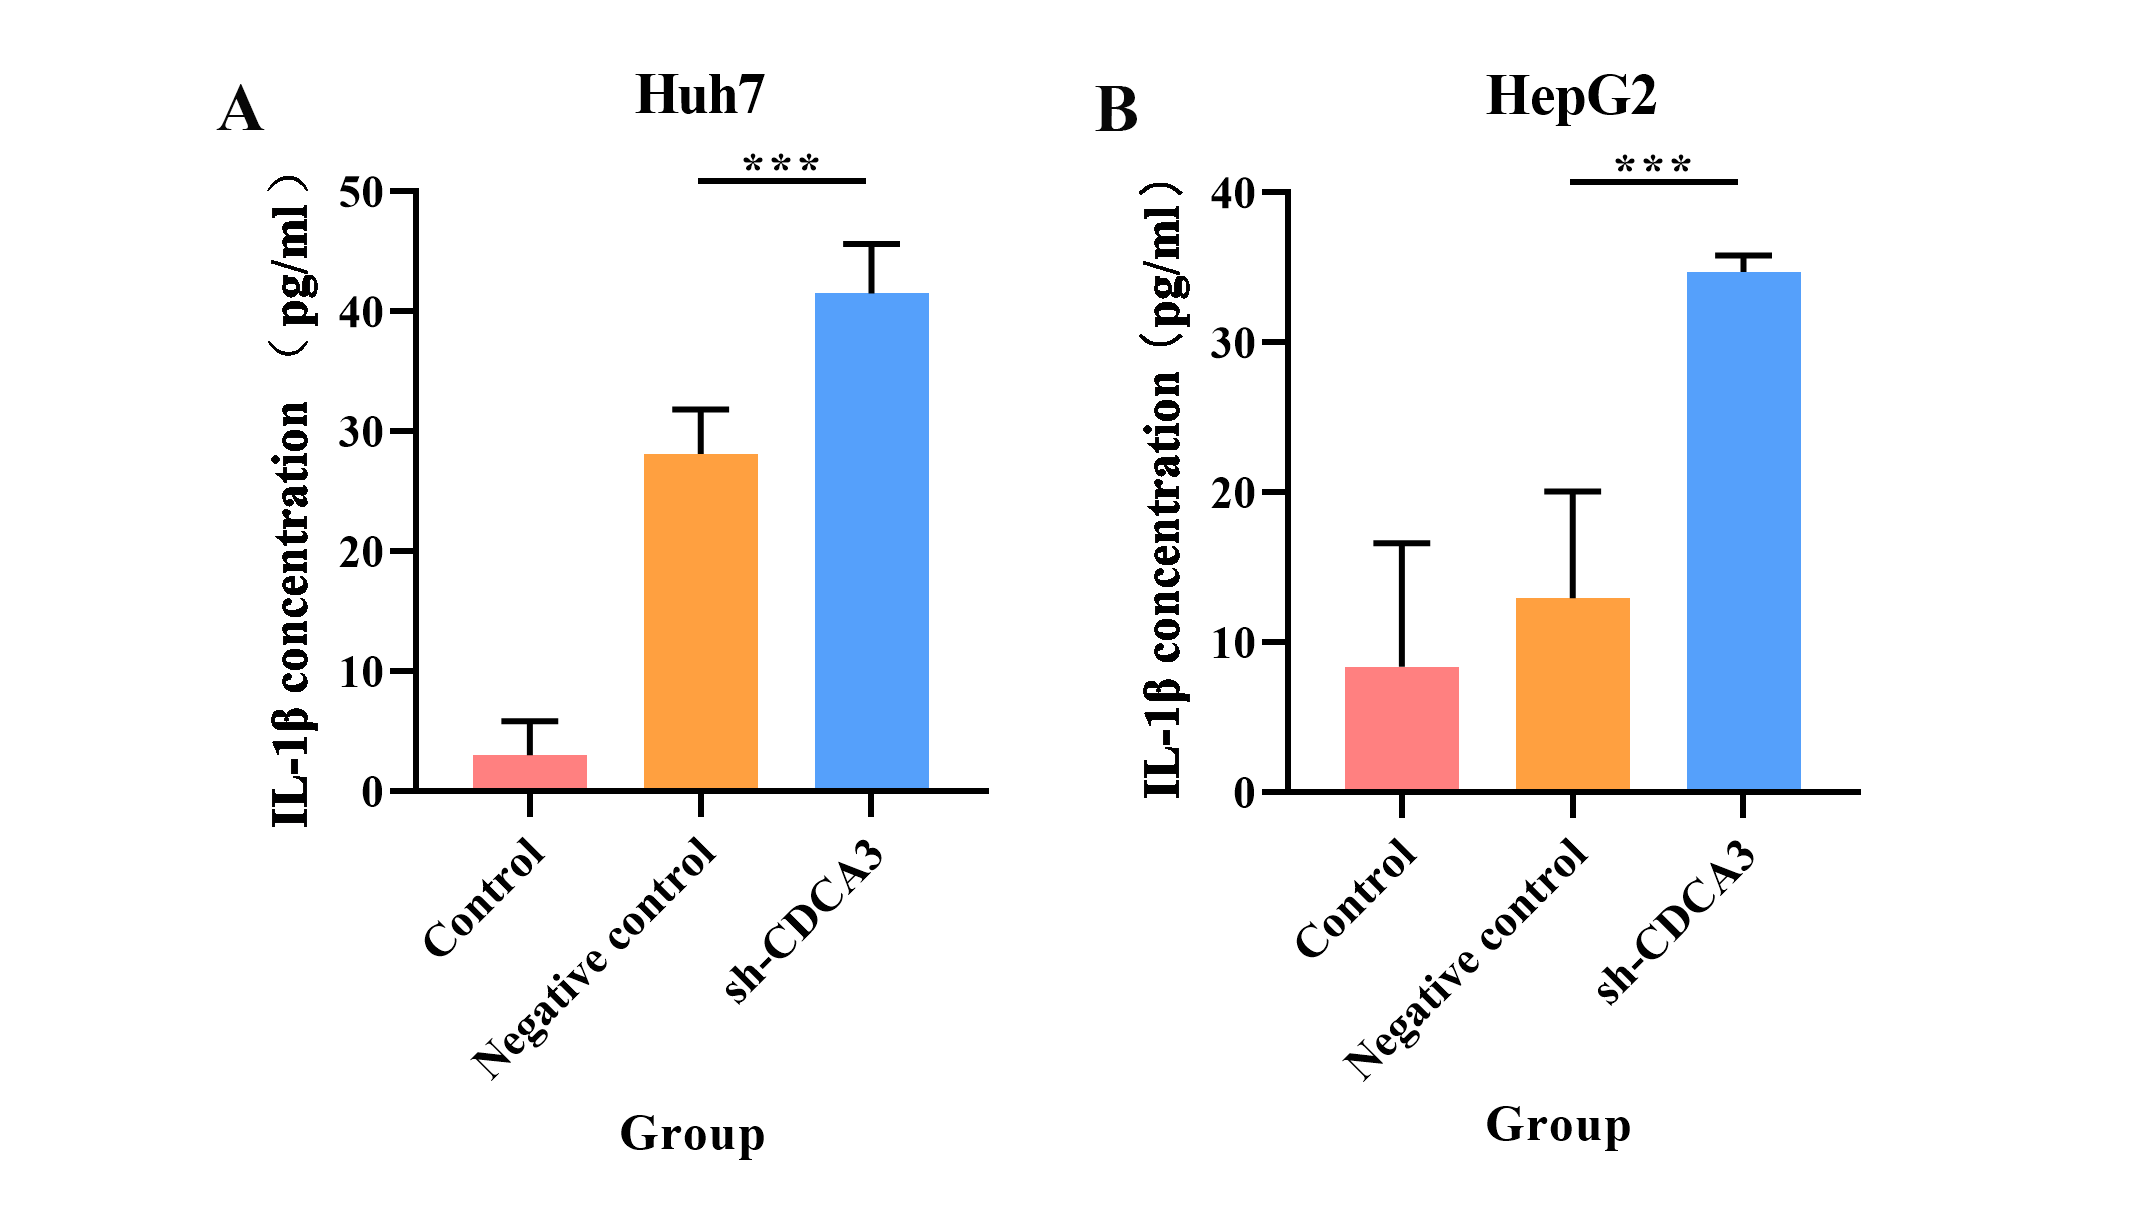


**Note:** ***p < 0.001.

Supplement: Supplementary file 1 [file 559772%20Supplementary%20Materials_1.docx]
